# Supplementary material for: Topochemical conversion of the discontinuous-zone-axis to form bismuth titanate oriented polycrystal nanocomposites
Source: Royal Society of Chemistry journal article supplement (doi:10.1039/d0qi00884b), 2020-12-11
Supplement: d0qi00884b1.pdf [file d0qi00884b1.pdf]

## Supporting Information

### Topochemical Conversion of Discontinuous-zone-axis to Form Bismuth Titanate Oriented Polycrystal Nanocomposites

Yan Wang<sup>†</sup>, Dandan Yang, Minggang Yao<sup>†</sup>, Lijie Li<sup>†</sup>, Zhuonan Huang<sup>†</sup>, Wenxiong Zhang<sup>§</sup>, Yinfeng Han<sup>\*, †</sup>, Galhenage Asha Sewvandi<sup>ϕ</sup>, Qi Feng<sup>¶</sup>, Dengwei Hu<sup>\*, †</sup>

<sup>†</sup> Faculty of Chemistry and Chemical Engineering, Engineering Research Center of Advanced Ferroelectric Functional Materials, Key Laboratory of Phytochemistry of Shaanxi Province, Baoji University of Arts and Sciences, 1 Hi-Tech Avenue, Baoji, Shaanxi, 721013 P. R. China

<sup>¶</sup> Department of Advanced Materials Science, Faculty of Engineering and Design, Kagawa University, 2217-20 Hayashi-cho, Takamatsu-shi, 761-0396, Japan

<sup>ϕ</sup> Department of Materials Science and Engineering, Faculty of Engineering, University of Moratuwa, Katubedda, Sri Lanka

<sup>§</sup> Institute for Solid State Physics, The University of Tokyo, Koto, Sayo, Hyogo 679-5148, Japan

#### TOC

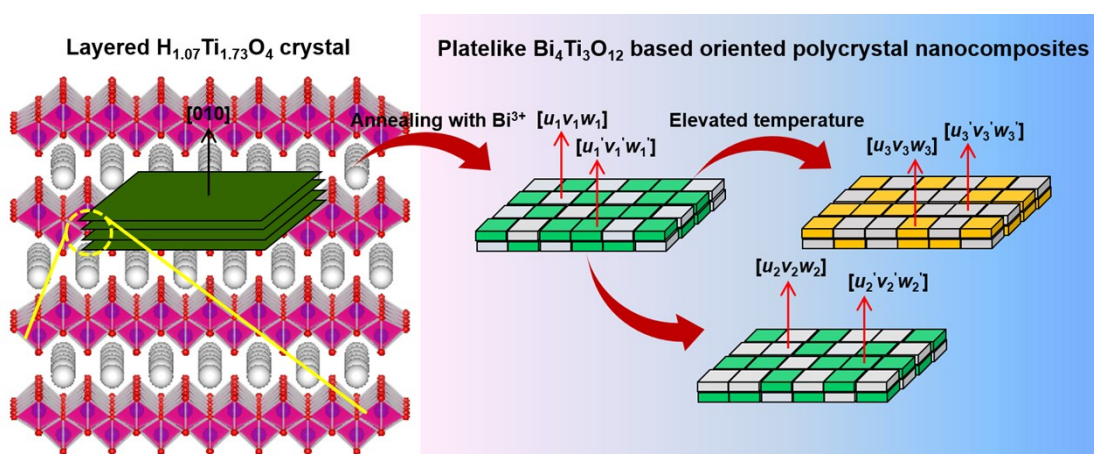

\*Corresponding Author

E-mail: hhanyinfeng@126.com (Y. Han), hdwpolymer@yahoo.co.jp (D. Hu).; Fax:

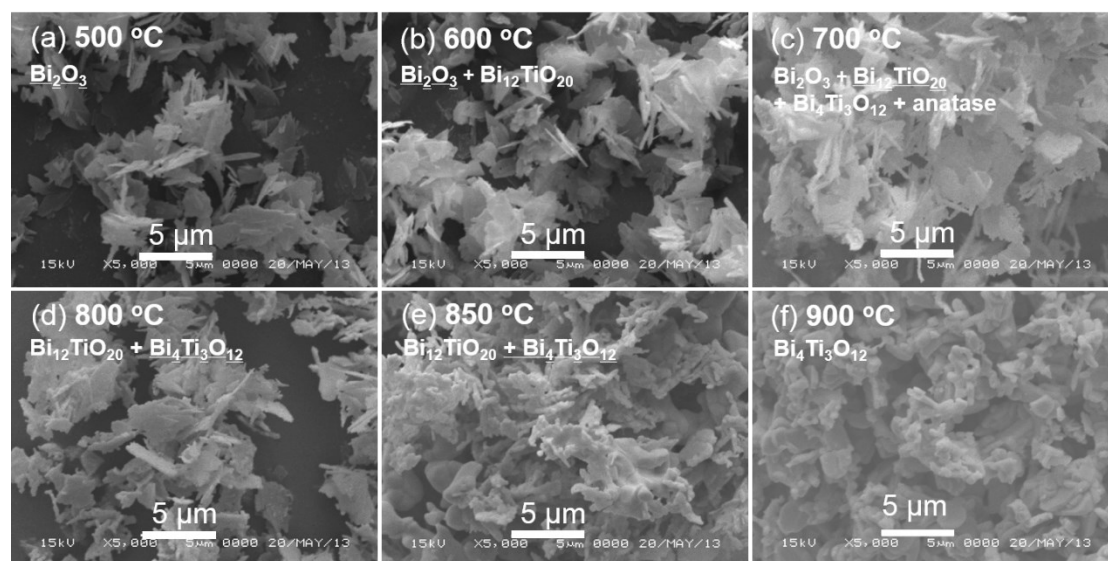

**Figure S1.** SEM images of samples obtained by annealing treatments of HTO-Bi<sub>2</sub>O<sub>3</sub> mixed powders at (a) 500, (b) 600, (c) 700, (d) 800, (e) 850, and (f) 900 °C for 3 h, respectively.

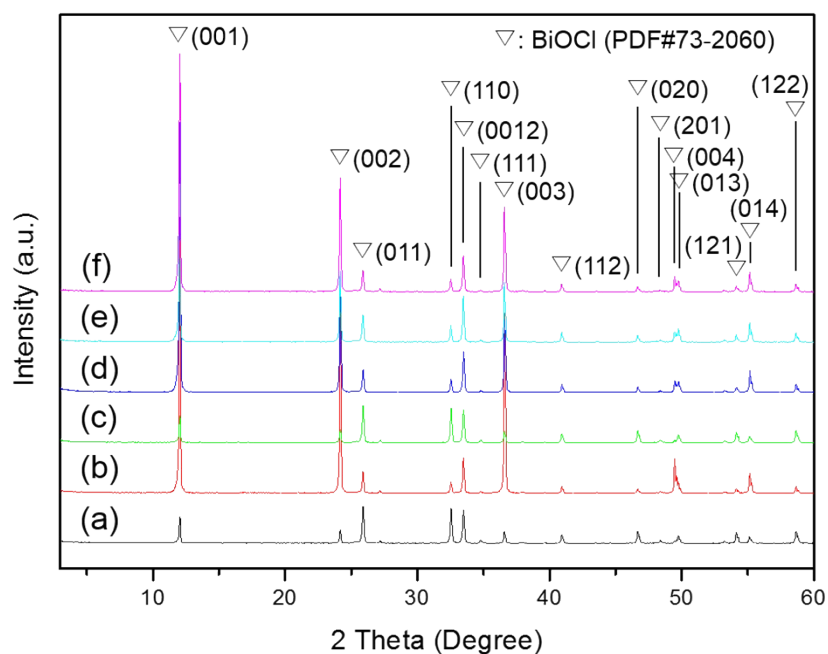

**Figure S2.** XRD patterns of samples obtained by solvothermal treatments of HTO-BiCl<sub>3</sub> mixed suspension in (a) ethanol, (b) ethanol-water (20-10, Vol-Vol), (c) ethanol-water (10-20), (d) aqueous solution, (e) acetic acid (0.5mol/L), and (f) acetic acid (0.5mol/L) – ethanol (10-20) different solutions at 200 °C for 12 h, respectively.

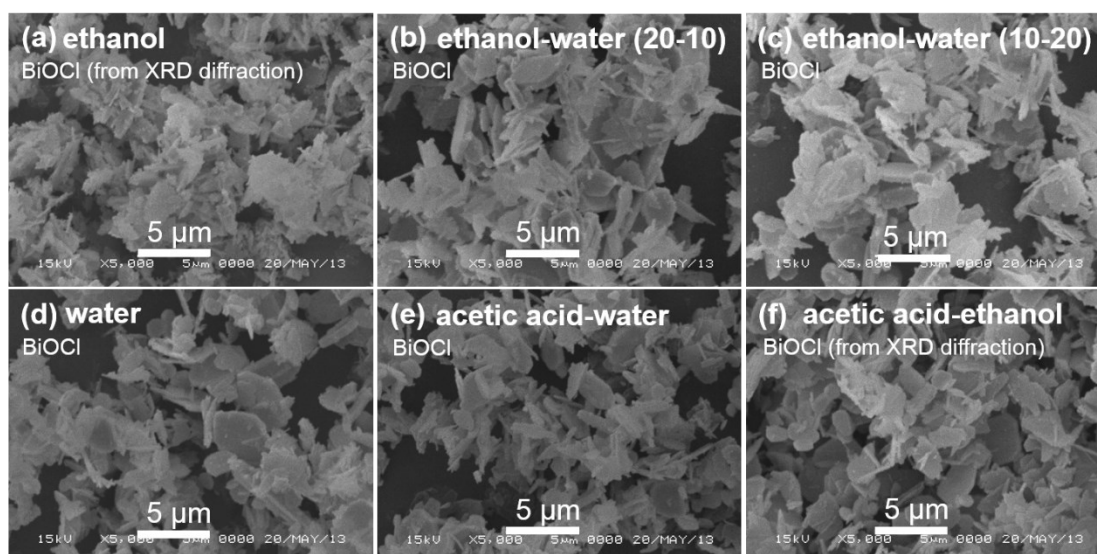

**Figure S3.** SEM images of samples obtained by solvothermal treatments of HTO-BiCl<sub>3</sub> mixed suspension in (a) ethanol, (b) ethanol-water (20-10, Vol-Vol), (c) ethanol-water (10-20), (d) aqueous solution, (e) acetic acid (0.5mol/L), and (f) acetic acid (0.5mol/L)–ethanol (10-20) different solutions at 200 °C for 12 h, respectively.

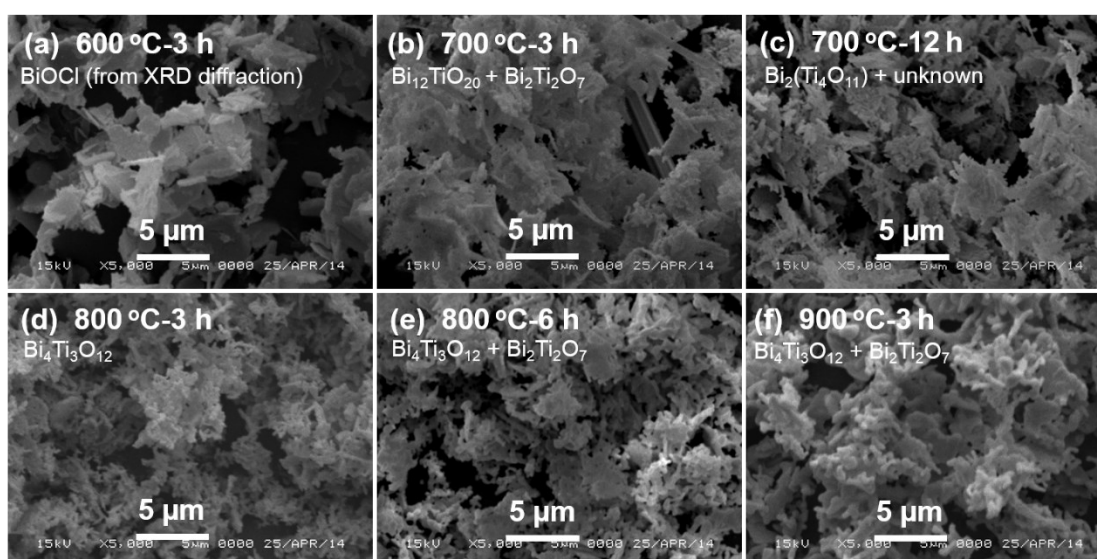

**Figure S4.** SEM images of samples obtained by annealing treatments of HTO-BiOCl nanocomposite crystals at 600 to 900 °C for 3 to 12 h, respectively. HTO-BiOCl nanocomposite crystals obtained by solvothermal treatment of HTO-BiCl<sub>3</sub> mixed suspension in aqueous solution at 200 °C for 12 h.

**Table S1.** Lattice mismatch rate of products in HTO-Bi<sub>2</sub>O<sub>3</sub> and HTO-BiCl<sub>3</sub> reaction systems<sup>a</sup>.

|                                    | Reaction condition | Phase composite of products                                                                     | Plane-11& Plane-21 <sup>b</sup> | <i>d</i> -11& <i>d</i> -21 <sup>c</sup> | Lattice mismatch rate between plane-11& plane-21 | Plane-12& Plane-22 | <i>d</i> -12& <i>d</i> -22 | Lattice mismatch rate between plane-12& plane-22 |
|------------------------------------|--------------------|-------------------------------------------------------------------------------------------------|---------------------------------|-----------------------------------------|--------------------------------------------------|--------------------|----------------------------|--------------------------------------------------|
| HTO-Bi <sub>2</sub> O <sub>3</sub> | 600 °C-3 h         | anatase/Bi <sub>12</sub> TiO <sub>20</sub>                                                      | (101)&(220)                     | 3.5171&3.5970                           | -2%                                              | (103)&(103)        | 2.4309&3.2173              | -                                                |
|                                    | 700 °C-3 h         | Bi <sub>12</sub> TiO <sub>20</sub> /Bi <sub>4</sub> Ti <sub>3</sub> O <sub>12</sub>             | (330)&(020)                     | 2.3980&2.7055                           | -13%                                             | (400)&(117)        | 2.5435&2.9686              | -17%                                             |
|                                    | 800 °C-3 h         | Bi <sub>12</sub> TiO <sub>20</sub> /Bi <sub>4</sub> Ti <sub>3</sub> O <sub>12</sub>             | (220)&(-111)                    | 3.5988&3.8132                           | -6%                                              | (-222)&(117)       | 2.9370&2.9686              | -1%                                              |
|                                    | 850 °C-3 h         | Bi <sub>12</sub> TiO <sub>20</sub> /Bi <sub>4</sub> Ti <sub>3</sub> O <sub>12</sub>             | (3-21)&(020)                    | 2.7191&2.7016                           | 1%                                               | (310)&(117)        | 3.2124&2.9661              | -8%                                              |
| HTO-BiCl <sub>3</sub>              | 600 °C-3 h         | anatase/BiOCl                                                                                   | (004)&(003)                     | 2.3785&2.4490                           | -3%                                              | (006)&(005)        | 1.5857&1.4694              | 7%                                               |
|                                    | 700 °C-3 h         | Bi <sub>12</sub> TiO <sub>20</sub> /Bi <sub>2</sub> Ti <sub>2</sub> O <sub>7</sub>              | (333)&(666)                     | 1.9580&1.9899                           | -2%                                              | (1-10)&(2-20)      | 7.1940&7.3115              | -2%                                              |
|                                    | 800 °C-6 h         | Bi <sub>4</sub> Ti <sub>3</sub> O <sub>12</sub> /Bi <sub>2</sub> Ti <sub>2</sub> O <sub>7</sub> | (005)&(444)                     | 6.5660&2.9849                           | -                                                | (220)&(8-80)       | 1.9196&1.8279              | 5%                                               |

<sup>a</sup> The crystal phases selected in this table are all derived from the SAED patterns of the samples. The error of the *d*-spacing is  $\pm 8 \sim \pm 13$  of the last digit of the decimal point.

<sup>b</sup> Plane-*xy* represents the no. *y* crystal Plane of the no. *x* phase in the phase composite of products.

<sup>c</sup> *d*-*xy* represents the average *d*-spacing of the no. *y* crystal Plane for the no. *x* phase in the phase composite of products.
